# Supplementary material for: Antimicrobial Use, Residues, Resistance and Governance in the Food and Agriculture Sectors, Tanzania
Source: MDPI journal article supplement (doi:10.3390/antibiotics10040454), 2021-04-16
Supplement: s1 [file s1]

**Table S1.** Regions and locations visited during data collection.

| Location          | Establishments visited during the mission                                                     |
|-------------------|-----------------------------------------------------------------------------------------------|
| Dar es Salaam     | Tanzania Food and Drug Authority                                                              |
|                   | Plant Protection Department (Division)                                                        |
|                   | Ministry of Livestock and Fisheries Development (MLFD) Directorate of Veterinary Services     |
| Dodoma            | Tanzania Food and Drug Authority (Central Zone)                                               |
|                   | Tanzania Veterinary Laboratory Agency (TVLA) Central Zone                                     |
|                   | Ministry of Agriculture, Plant Protection Department (Division) Central Zone                  |
|                   | Dodoma Urban Water and Sanitation Authority (DUWASA)                                          |
| Arusha            | Nelson Mandela African Institutions of Science and Technology (NM-AIST)                       |
|                   | East Africa Community (Productive Sectors), Department of Agriculture and Food security       |
|                   | Arusha Zonal Veterinary Investigation Center (ZVIC)                                           |
|                   | Tanzania Veterinary Laboratory Agency (TVLA) Northern Zone                                    |
|                   | Meru District Council: District Veterinary Officer (DVO) and District Fisheries Officer (DFO) |
|                   | Tropical Pesticide Research Institute (TPRI)                                                  |
| Morogoro          | Aquatic and Veterinary Shop in Arusha                                                         |
|                   | Sokoine University of Agriculture (SUA)                                                       |
| Zanzibar (Unguja) | Directorate of Veterinary Services                                                            |
|                   | Division of Plant Protection and Produce Inspection                                           |
|                   | Zanzibar Food and Drug Agency (ZFDA)                                                          |

**Table S2.** List of relevant documents, grey literature and instruments related to AMR in Tanzania consulted and references.

|                                                             | Reference |
|-------------------------------------------------------------|-----------|
| Fisheries Act No 22 of 2003.                                | [1]       |
| Fisheries Regulation of 2009.                               | [2]       |
| Tanzania Food and Drug Authority (TFDA) Act No 1 of 2003.   | [3]       |
| Tanzania Food and Drug Authority (TFDA) Regulation of 2006. | [4]       |
| Tropical Pesticide Research Institute Act No 18 of 1979.    | [5]       |
| The Veterinary Act No 16 of 2003.                           | [6]       |
| The Animal Disease Act No 17 of 2003.                       | [7]       |
| The Dairy Industry Act No 8 of 2004 Cap 262.                | [8]       |
| Animal Disease Regulations of 2007.                         | [9]       |

|                                                                                    |      |
|------------------------------------------------------------------------------------|------|
| National Livestock Policy, 2006.                                                   | [10] |
| Livestock Sector Development Strategy, 2010.                                       | [11] |
| Livestock Sector Development Programme, 2011.                                      | [12] |
| Tanzania Livestock Modernization Initiatives, 2015.                                | [13] |
| Environmental Management Act 20 of 2004.                                           | [14] |
| The Grazing Land and Animal Feed Resources Act<br>No.13 of 2010                    | [15] |
| The Grazing Land and Animal Resources Regula-<br>tions of 2010.                    | [16] |
| The Meat Industry Act No10 of 2006.                                                | [17] |
| Animal Welfare Act No. 19 of 2010.                                                 | [18] |
| The Hides and Skin Trade Act No 18 of 2008.                                        | [19] |
| National Guideline for Supervision of Livestock<br>Services of 2016.               | [20] |
| The Livestock Identification, Registration and<br>Traceability Act No 12 of 2010.  | [21] |
| The East Africa Community (EAC) - Sanitary and<br>Phytosanitary Protocol.          | [22] |
| Livestock Extension Service Guidelines 2006.                                       | [23] |
| World Trade Organization (WTO): Sanitary and<br>Phytosanitary Measures Agreements. | [24] |
| National Action Plan for Antimicrobial Resistance<br>2017.                         | [25] |
| The WHO Global Action Plan for Antimicrobial Re-<br>sistance 2015.                 | [26] |
| OIE Performance of Veterinary Services (PVS) Fol-<br>low-up Mission Report 2016    | [27] |
| The FAO Action Plan on Antimicrobial Resistance<br>2016.                           | [28] |
| Zanzibar Livestock Policy, 2011.                                                   | [29] |
| Mwongozo wa Usajili wa Maduka ya Dawa Mu-<br>himu za Mifugo, 2015. (in Swahili)    | [30] |
| Additional resources [31–33].                                                      |      |

## References

- Government of Tanzania. *Fisheries Act, 2003*; Act No. 22 of 2003, Government Press, Dar es Salaam, Tanzania, 42p, Available online: <http://extwprlegs1.fao.org/docs/pdf/tan53024.pdf> (accessed on 23 February 2021).
- Government of Tanzania. *Tanzania Fisheries Regulations of 2009*; Act No.2 of 2009, Government Press, Dar es Salaam, Tanzania, 520p, Available online: <http://extwprlegs1.fao.org/docs/pdf/vic121353.pdf> (accessed on 23 February 2021).
- Government of Tanzania. *Tanzania Foods, Drugs and Cosmetics Act of 2003, Part IV, 2003*; Act No.1 of 2003, Government Press, Dar es Salaam, Tanzania, 89p, Available online: <https://tanzania.eregulations.org/media/TFDA%20ACT.pdf> (accessed on 23 February 2021)
- Government of Tanzania. *Tanzania Food and Drug Authority (TFDA) Regulation of 2006.*; Act No.116 of 2006, Government Press, Dar es Salaam, Tanzania, 11p, Available online: <http://extwprlegs1.fao.org/docs/pdf/tan153765.pdf> (accessed on 23 February 2021)
- Government of Tanzania. *Tropical Pesticides Research Institute Act, 1979 (No. 18 of 1979)*; Act No.18 of 1979, Government Press, Dar es Salaam, Tanzania, 30p, Available online: <http://extwprlegs1.fao.org/docs/pdf/tan4081.pdf> (accessed on 23 February 2021)
- Government of Tanzania. *The Veterinary Act, 2003*; Act No.16 of 2003, Government Press, Dar es Salaam, Tanzania, 31p, Available online: <https://www.mifugouvuvu.go.tz/uploads/publications/sw1595836341-The%20Veterinary%20Act,%202003.pdf> (accessed on 23 February 2021)
- Government of Tanzania. *Animal Disease Act*; Act No.17 of 2003, Government Press, Dar es Salaam, Tanzania, 10p, Available online: <http://extwprlegs1.fao.org/docs/pdf/tan169399.pdf> (accessed on 23 February 2021)
- Government of Tanzania. *The Dairy Industry Act No 8 of 2004 Cap 262.*, Act No. 8 of 2004, Government Press, Dar es Salaam, Tanzania, 22p, Available online: <http://extwprlegs1.fao.org/docs/pdf/tan61559.pdf> (accessed on 23 February 2021)

9. Government of Tanzania. *Animal Disease Regulations of 2001, Act No. 131 of 2001*, Government Press, Dar es Salaam, Tanzania, 4p, Available online: <http://extwprlegs1.fao.org/docs/pdf/tan28124.pdf> (accessed on 23 February 2021)
10. Government of Tanzania. *National Livestock Policy, 2006*, Government Press, Dar es Salaam, Tanzania, 55p, Available online: [https://www.tnrf.org/files/E-INFO\\_National\\_Livestock\\_Policy\\_Final\\_as\\_per\\_Cabinet\\_Dec-2006.pdf](https://www.tnrf.org/files/E-INFO_National_Livestock_Policy_Final_as_per_Cabinet_Dec-2006.pdf) (accessed on 23 February 2021)
11. Government of Tanzania. *Livestock Sector Development Strategy, 2010.*, Government Press, Dar es Salaam, Tanzania, 90p, Available online: [https://www.tanzania.go.tz/egov\\_uploads/documents/development\\_strategy- Livestock\\_sw.pdf](https://www.tanzania.go.tz/egov_uploads/documents/development_strategy- Livestock_sw.pdf) (accessed on 23 February 2021)
12. Government of Tanzania. *Livestock Sector Development Strategy, 2011*, Government Press, Dar es Salaam, Tanzania, 123p, Available online: [https://www.tanzania.go.tz/egov\\_uploads/documents/Livestock\\_Programe\\_sw.pdf](https://www.tanzania.go.tz/egov_uploads/documents/Livestock_Programe_sw.pdf) (accessed on 23 February 2021)
13. Government of Tanzania. *Tanzania Livestock Modernization Initiatives, 2015.*, Government Press, Dar es Salaam, Tanzania, 40p, Available online: [https://livestocklivelihoodsandhealth.org/wp-content/uploads/2015/07/Tanzania\\_Livestock\\_Modernization\\_Initiative\\_July\\_2015.pdf](https://livestocklivelihoodsandhealth.org/wp-content/uploads/2015/07/Tanzania_Livestock_Modernization_Initiative_July_2015.pdf) (accessed on 23 February 2021)
14. Government of Tanzania. *Environmental Management Act, 2004, Act No. 20 of 2004*, Government Press, Dar es Salaam, Tanzania, 129p, Available online: <http://extwprlegs1.fao.org/docs/pdf/tan61491.pdf> (accessed on 23 February 2021)
15. Government of Tanzania. *Tanzania Grazing Land and Animal Feed Resources Act, 2010; Act No.13 of 2010*, Government Press, Dar es Salaam, Tanzania, 32p, Available online: <http://extwprlegs1.fao.org/docs/pdf/tan97356.pdf> (accessed on 23 February 2021)
16. Government of Tanzania. *The Grazing Land and Animal Resources Regulations of 2010; Act No.13 of 2010*, Government Press, Dar es Salaam, Tanzania, 32p, Available online: <https://www.mifugouvuvuvi.go.tz/uploads/publications/en1595835588-GRAZING%20LAND%20AND%20ANIMAL%20FEED%20RESOURCE%20ACT%202010.pdf> (accessed on 23 February 2021)
17. Government of Tanzania. *The Meat Industry Act No10 of 2006; Act No.10 of 2006*, Government Press, Dar es Salaam, Tanzania, 19p, Available online: <https://trade.business.go.tz/media/The%20Meat%20industry%20Act,%202006.pdf> (accessed on 23 February 2021)
18. Government of Tanzania. *Tanzania Animal Welfare Act, 2008; Act No.19 of 2009*, Government Press, Dar es Salaam, Tanzania, 25p, Available online: <http://extwprlegs1.fao.org/docs/pdf/tan85327.pdf> (accessed on 23 February 2021)
19. Government of Tanzania. *The Hides and Skin Trade Act No 18 of 2008; Act No.18 of 2008*, Government Press, Dar es Salaam, Tanzania, 23p, Available online: [https://www.tanzania.go.tz/egov\\_uploads/documents/The\\_Hides,\\_Skins\\_and\\_Leather\\_Trade\\_Act,\\_2008\\_-\\_Act\\_No\\_sw.pdf](https://www.tanzania.go.tz/egov_uploads/documents/The_Hides,_Skins_and_Leather_Trade_Act,_2008_-_Act_No_sw.pdf) (accessed on 23 February 2021)
20. Government of Tanzania. *National Guideline for Supervision of Livestock Services of 2016*, Government Press, Dar es Salaam, Tanzania, 57p, Internal document.
21. Government of Tanzania. *Livestock Identification, Registration and Traceability Act, 2010; Act No. 12 of 2010*, Government Press, Dar es Salaam, Tanzania, 18p, Available online: <http://extwprlegs1.fao.org/docs/pdf/tan97294.pdf> (accessed on 23 February 2021)
22. East African Community. *EAC Protocol on Sanitary and Phytosanitary (SPS) Measures, 2013; July 2013*, EAC Press, Arusha, Tanzania, 11p, Available online: <https://www.eac.int/documents/category/sanitary-and-phytosanitary-sps-measures> (The harmonised EAC SPS measures (under review) Section 2.8-(2.8.1), Section 3.7-(3.7.5), Section 3.7-(3.7.6) and Section 3.12) (accessed on 23 February 2021)
23. Government of Tanzania. *Livestock Extension Service Guidelines 2006.*, Government Press, Dar es Salaam, Tanzania, 27p, Available online: <http://vetparaprofessional.blogspot.com/2012/08/livestock-extension-guideline.html> (accessed on 23 February 2021)
24. World Trade Organization (WTO). *Sanitary and Phyto-sanitary Measures Agreements.*, Available online: [https://www.wto.org/english/tratop\\_e/sps\\_e/spsund\\_e.htm#:~:text=protecting%20domestic%20producers%3F-,The%20Agreement%20on%20the%20Application%20of%20Sanitary%20and%20Phytosanitary%20Measures,to%20set%20their%20own%20standards.&text=They%20should%20be%20applied%20only.or%20plant%20life%20or%20health](https://www.wto.org/english/tratop_e/sps_e/spsund_e.htm#:~:text=protecting%20domestic%20producers%3F-,The%20Agreement%20on%20the%20Application%20of%20Sanitary%20and%20Phytosanitary%20Measures,to%20set%20their%20own%20standards.&text=They%20should%20be%20applied%20only.or%20plant%20life%20or%20health). (accessed 23 March 2021)
25. Government of Tanzania. *The United Republic of Tanzania: The national action plan on antimicrobial resistance 2017-2022*, WHO, Dar es Salaam, Tanzania, 76p, Available online: <https://www.who.int/publications/m/item/united-republic-of-tanzania-the-national-action-plan-on-antimicrobial-resistance> (accessed on 23 February 2021)
26. World Health Organization. *Global Action Plan on Antimicrobial Resistance. 2015*. Available online: <https://www.who.int/antimicrobial-resistance/global-action-plan/en/> (accessed on 23 February 2021).
27. Government of Tanzania and World Organisation for Animal Health. *OIE Performance of Veterinary Services (PVS) Evaluation Report 2008*, 188p, OIE, Paris, France, Available online: <https://rr-africa.oie.int/wp-content/uploads/2019/11/tanzania-2016-fu.pdf> (accessed on 23 February 2021)
28. Food and Agriculture Organization of the United Nations (FAO). *The FAO Action Plan on Antimicrobial Resistance 2016-2020*, FAO, Rome, Italy, 25p, Available online: <http://www.fao.org/3/i5996e/i5996e.pdf> (accessed on 23 February 2021)

- 
29. Revolutionary Government of Zanzibar. *Zanzibar Livestock Policy*; 2011, Government Press, StoneTown, Zanzibar, 101p, Available online: [http://www.tzdpag.or.tz/fileadmin/documents/dpg\\_internal/dpg\\_working\\_groups\\_clusters/cluster\\_1/agriculture/2. Ag\\_policies\\_and\\_strategies/Zanzibar\\_Ag\\_policies/2. 2011\\_Zanzibar\\_Livestock\\_Policy\\_bk\\_edit.pdf](http://www.tzdpag.or.tz/fileadmin/documents/dpg_internal/dpg_working_groups_clusters/cluster_1/agriculture/2. Ag_policies_and_strategies/Zanzibar_Ag_policies/2. 2011_Zanzibar_Livestock_Policy_bk_edit.pdf) (accessed on 23 February 2021)
  30. Government of Tanzania. *Mwongozo wa Usajili wa Maduka ya Dawa Muhimu za Mifugo (in Swahili)*, 2015, Government Press, Dar es Salaam, Tanzania, 32p, Available online: [https://www.tanzania.go.tz/egov\\_uploads/documents/mwongozo\\_wa\\_usajili\\_wa\\_maduka\\_ya\\_dawa\\_muhimu\\_za\\_mifugo\\_sw.pdf](https://www.tanzania.go.tz/egov_uploads/documents/mwongozo_wa_usajili_wa_maduka_ya_dawa_muhimu_za_mifugo_sw.pdf) (accessed on 23 February 2021)
  31. Government of Tanzania. *Tanzania Pharmacy Act, 2011*; Act No.1 of 2011, Government Press, Dar es Salaam, Tanzania, 38p, Available online: <https://www.pc.go.tz/files/THE%20PHARMACY%20ACT-2011.pdf> (accessed on 23 February 2021)
  32. Government of Tanzania. *Tanzania Water Supply and Sanitation Act, 2009*; Act No.12 of 2009, Government Press, Dar es Salaam, Tanzania, 31p, Available online: <https://www.duwasa.go.tz/uploads/publications/en-1566284112-THE%20WATER%20SUPPLY%20AND%20SANITATION%20ACT%20NO%2012%20OF%202009.pdf> (accessed on 23 February 2021)
  33. Government of Tanzania. *Tanzania Public Health Act, 2009*; Act No.1 of 2009, Government Press, Dar es Salaam, Tanzania, 105p, Available online: [https://www.tanzania.go.tz/egov\\_uploads/documents/The\\_Public\\_Health\\_Act,\\_2009\\_\(Act\\_No\\_sw.pdf](https://www.tanzania.go.tz/egov_uploads/documents/The_Public_Health_Act,_2009_(Act_No_sw.pdf) (accessed on 23 February 2021)
